# Supplementary material for: Investigation of the impact of zeolite shaping and salt deposition on the characteristics and performance of composite thermochemical heat storage systems
Source: Royal Society of Chemistry journal article supplement (doi:10.1039/d2ta07615b), 2022-12-23
Supplement: d2ta07615b1.pdf [file d2ta07615b1.pdf]

**Investigation of the impact of zeolite shaping and salt deposition on the characteristics and performance of composite thermochemical heat storage systems.**

**-Supplementary data-**

Quentin Touloumet<sup>a</sup>, Georgeta Postole<sup>a\*</sup>, Laurence Massin<sup>a</sup>, Chantal Lorentz<sup>a</sup>, Aline Auroux<sup>a\*</sup>

<sup>a</sup> *Univ Lyon, Université Claude Bernard Lyon 1, CNRS, IRCELYON, F-69626 Villeurbanne, France*

Corresponding authors: [georgeta.postole@ircelyon.univ-lyon1.fr](mailto:georgeta.postole@ircelyon.univ-lyon1.fr)  
[aline.auroux@ircelyon.univ-lyon1.fr](mailto:aline.auroux@ircelyon.univ-lyon1.fr)

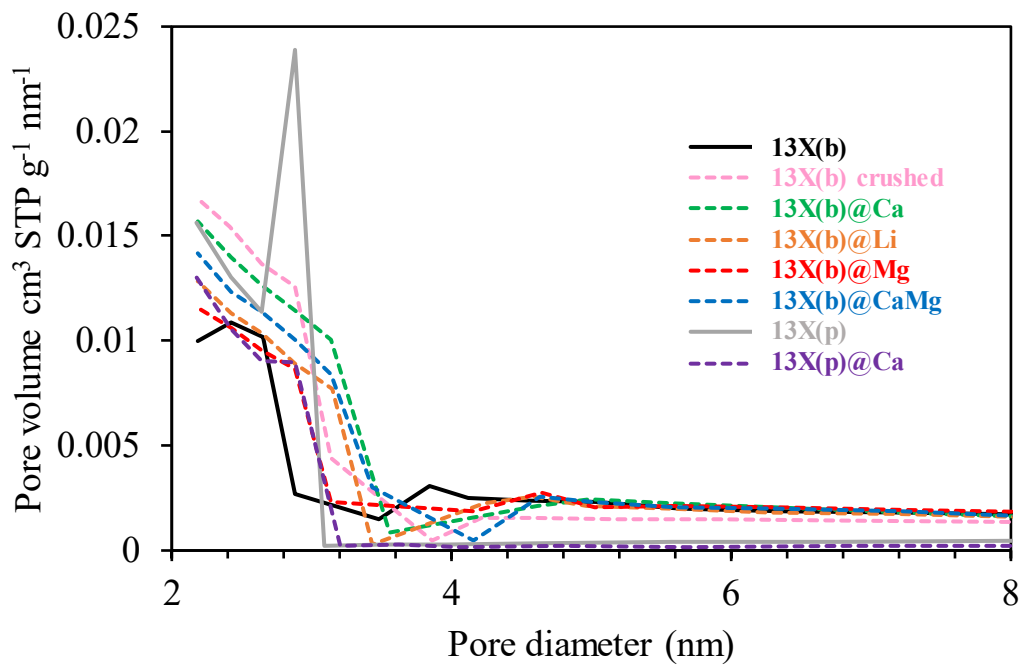

**Figure S1.** Pore size distribution of 13X based materials between 2-8 nm.

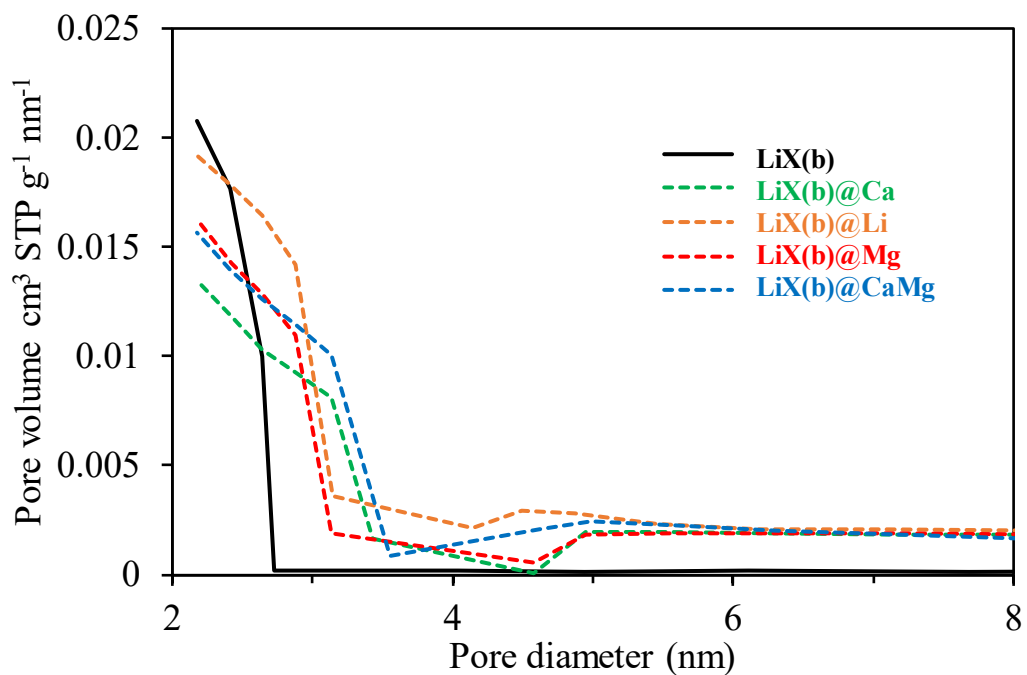

**Figure S2.** Pore size distribution of LiX(b) and corresponding composites between 2-8 nm.

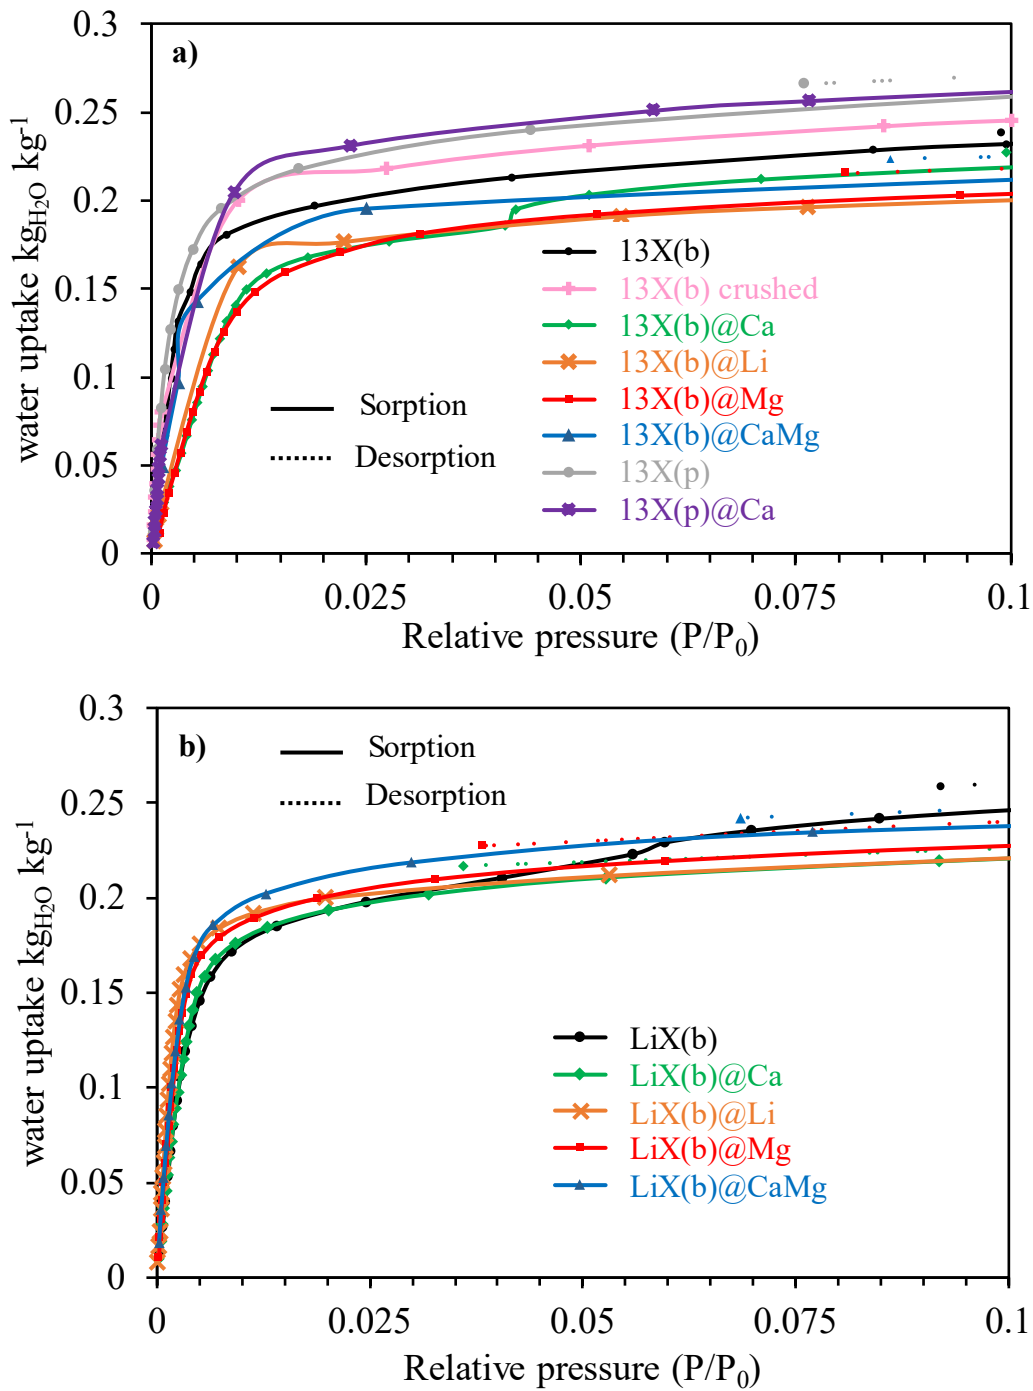

**Figure S3.** Water vapor sorption/desorption isotherms at 25 °C of 13X (a) and LiX (b) and corresponding composites.

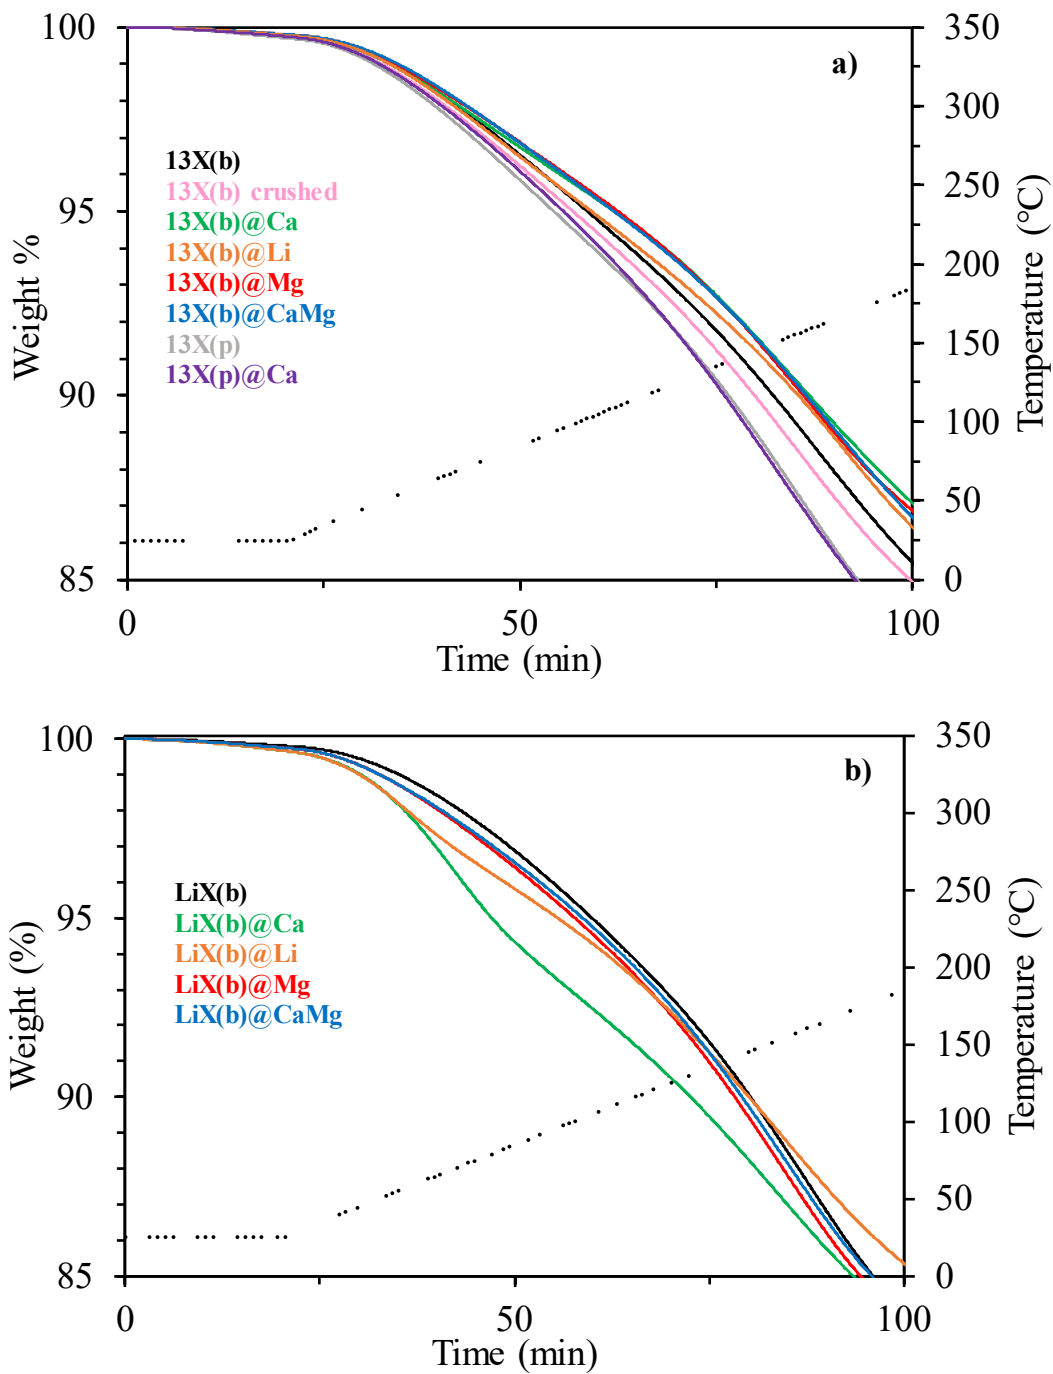

**Figure S4.** Weight evolution during first 100 min of the second dehydration of 13X (a) and LiX (b) and corresponding composites

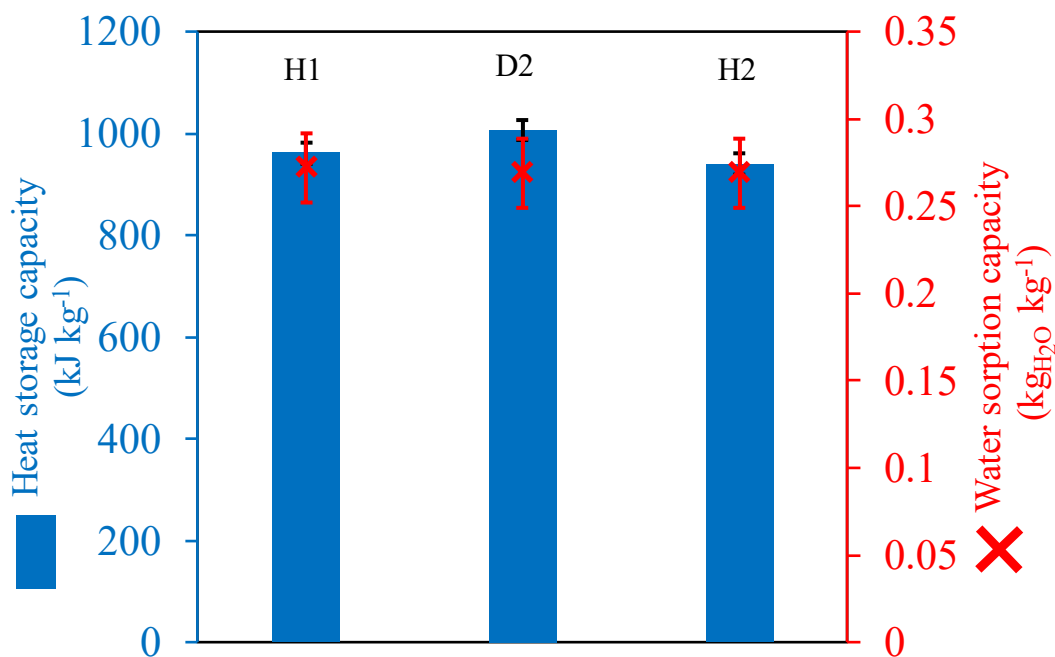

**Figure S5.** Heat and water storage capacities of 13X(b) during first hydration (H1), second dehydration (D2) and second hydration (H2).

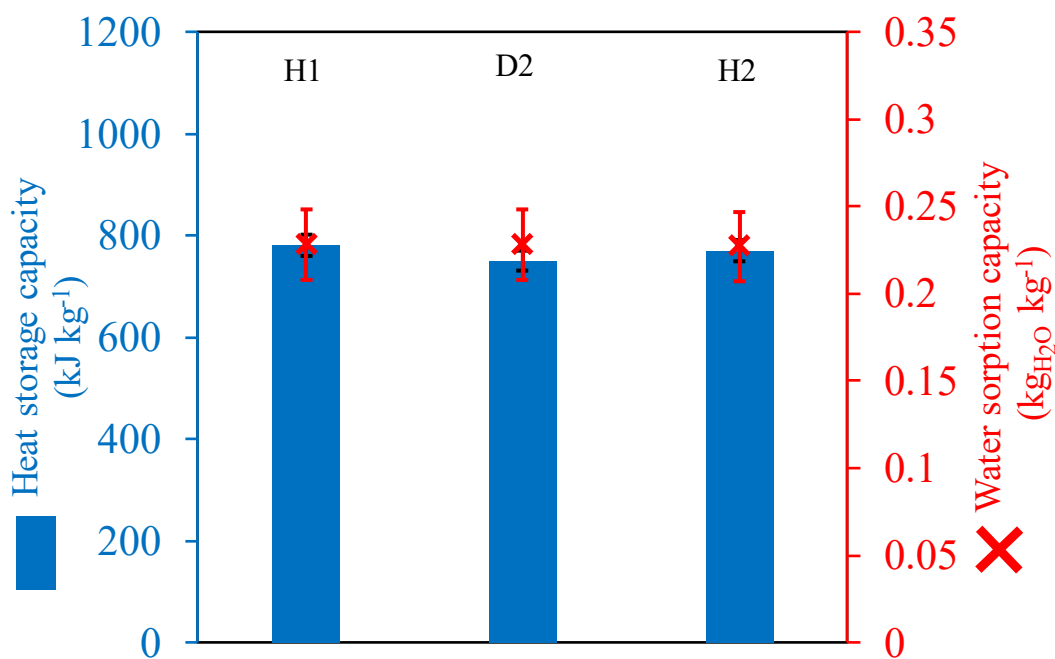

**Figure S6.** Heat and water storage capacities of 13X(b)@Ca during first hydration (H1), second dehydration (D2) and second hydration (H2).

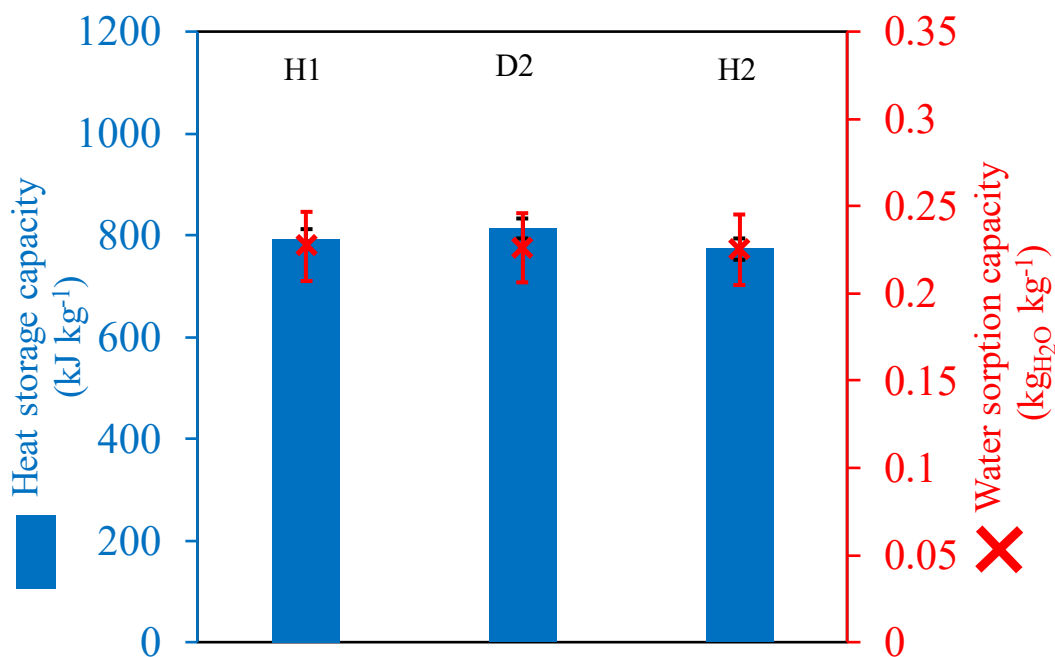

**Figure S7.** Heat and water storage capacities of 13X(b)@Mg during first hydration (H1), second dehydration (D2) and second hydration (H2).

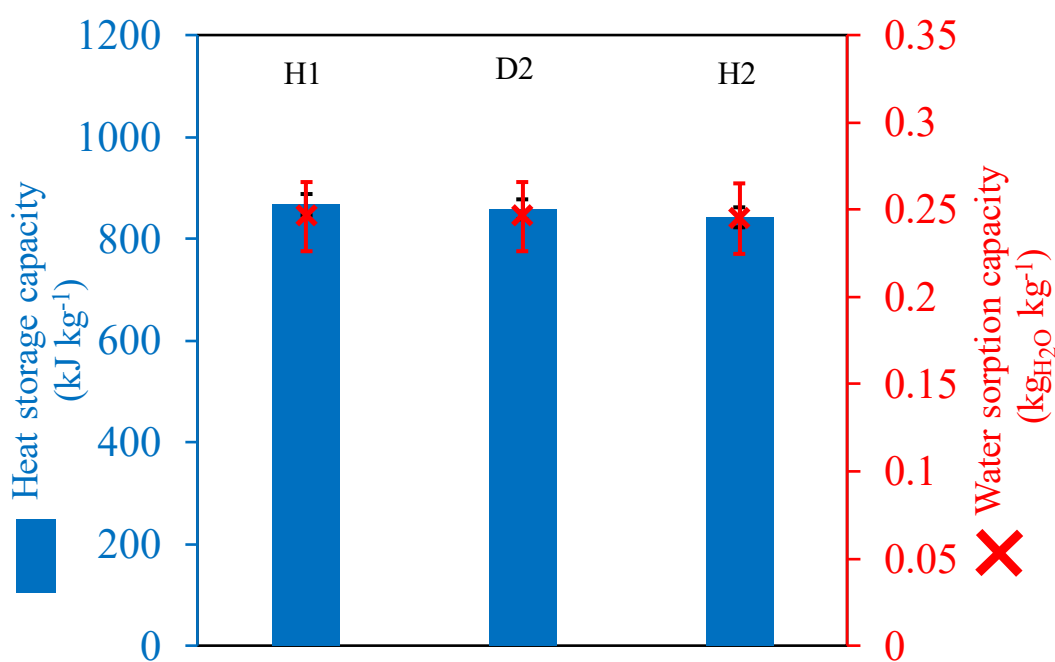

**Figure S8.** Heat and water storage capacities of 13X(b)@Li during first hydration (H1), second dehydration (D2) and second hydration (H2).

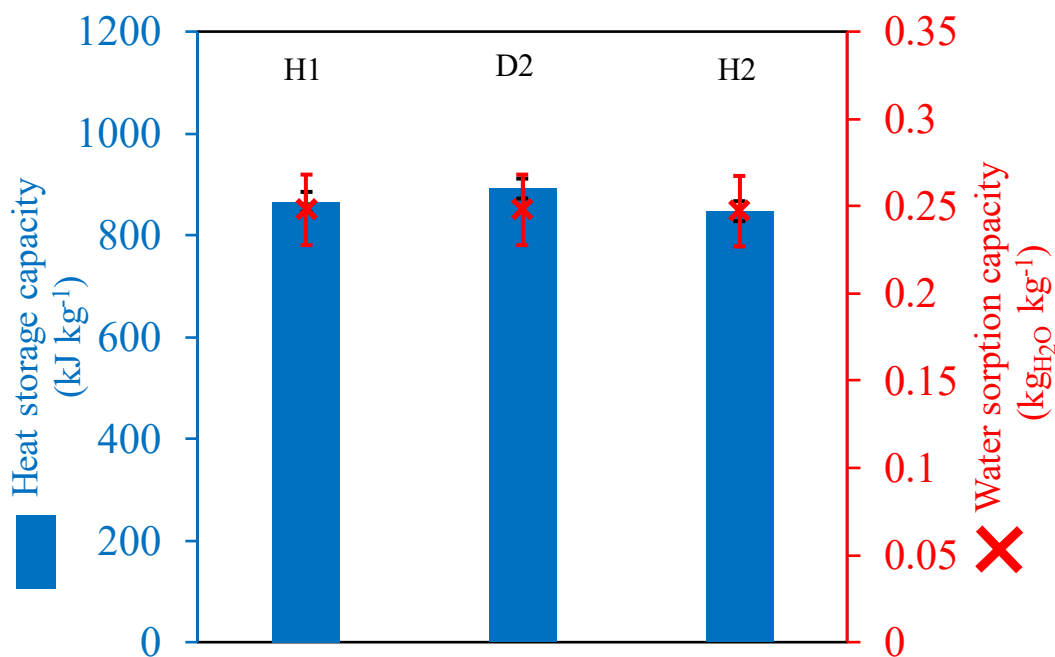

**Figure S9.** Heat and water storage capacities of 13X(b)@CaMg during first hydration (H1), second dehydration (D2) and second hydration (H2).

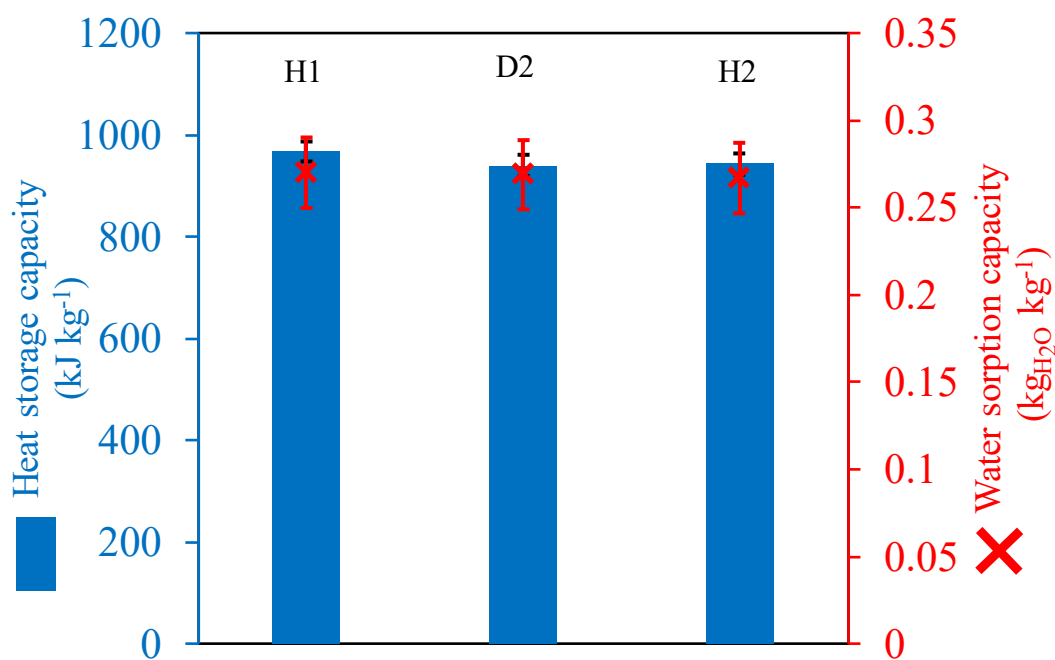

**Figure S10.** Heat and water storage capacities of 13X(b) crushed during first hydration (H1), second dehydration (D2) and second hydration (H2).

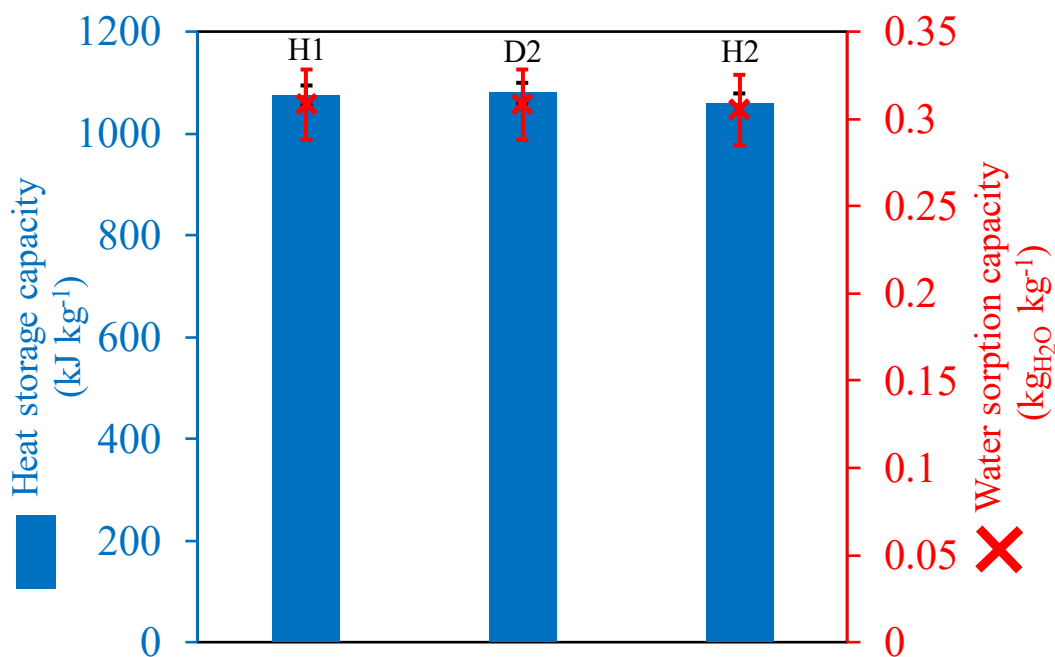

**Figure S11.** Heat and water storage capacities of 13X(p) during first hydration (H1), second dehydration (D2) and second hydration (H2).

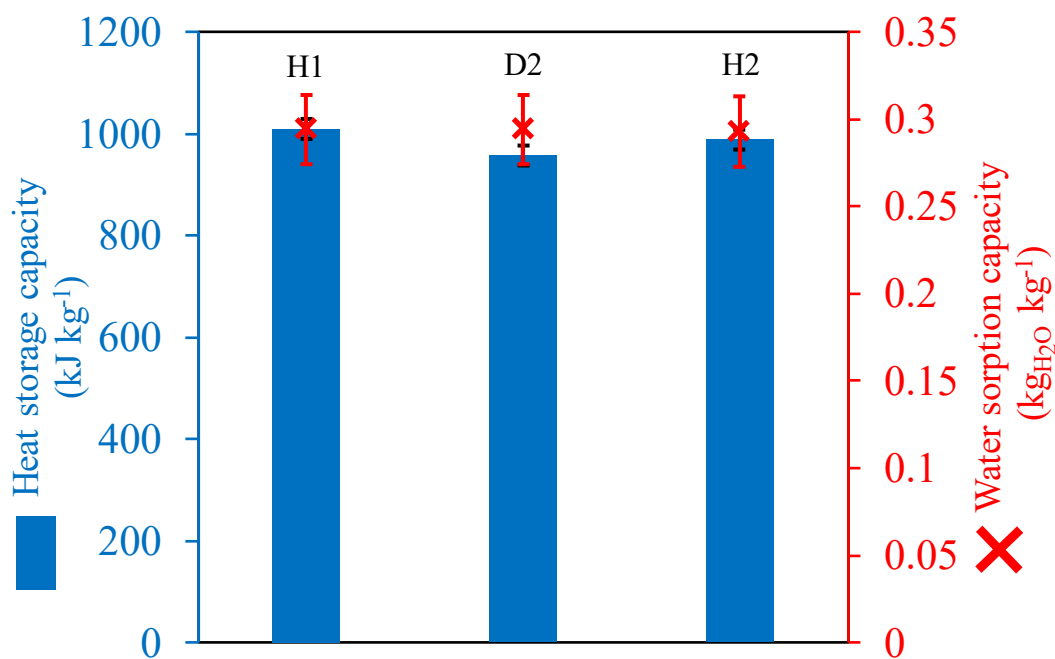

**Figure S12.** Heat and water storage capacities of 13X(p)@Ca during first hydration (H1), second dehydration (D2) and second hydration (H2).



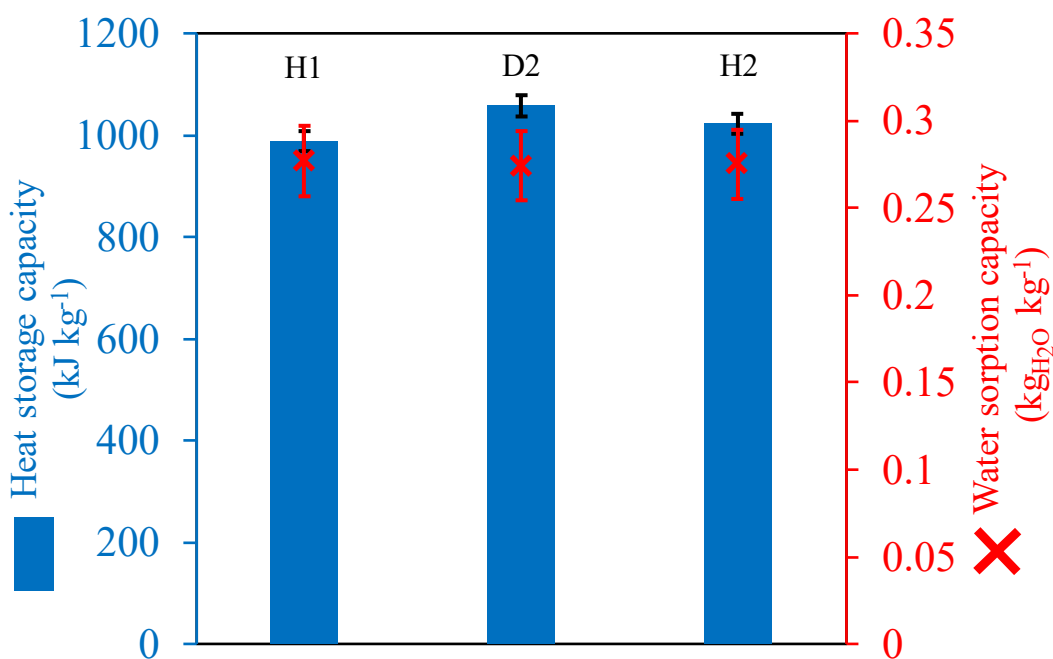

**Figure S13.** Heat and water storage capacities of LiX(b) during first hydration (H1), second dehydration (D2) and second hydration (H2).

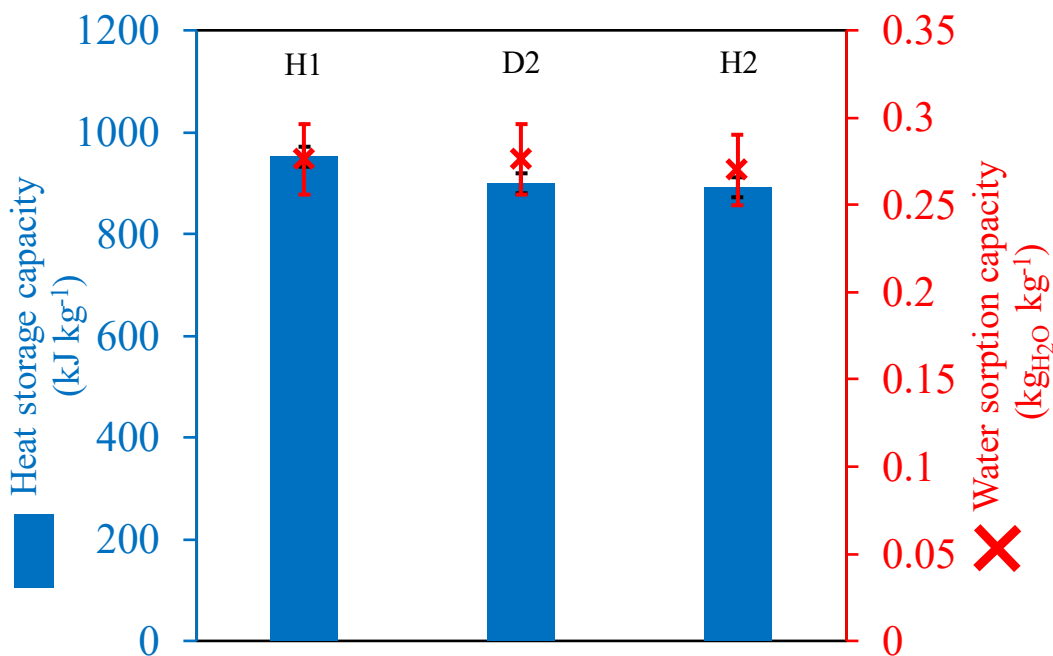

**Figure S14.** Heat and water storage capacities of LiX(b)@Ca during first hydration (H1), second dehydration (D2) and second hydration (H2).

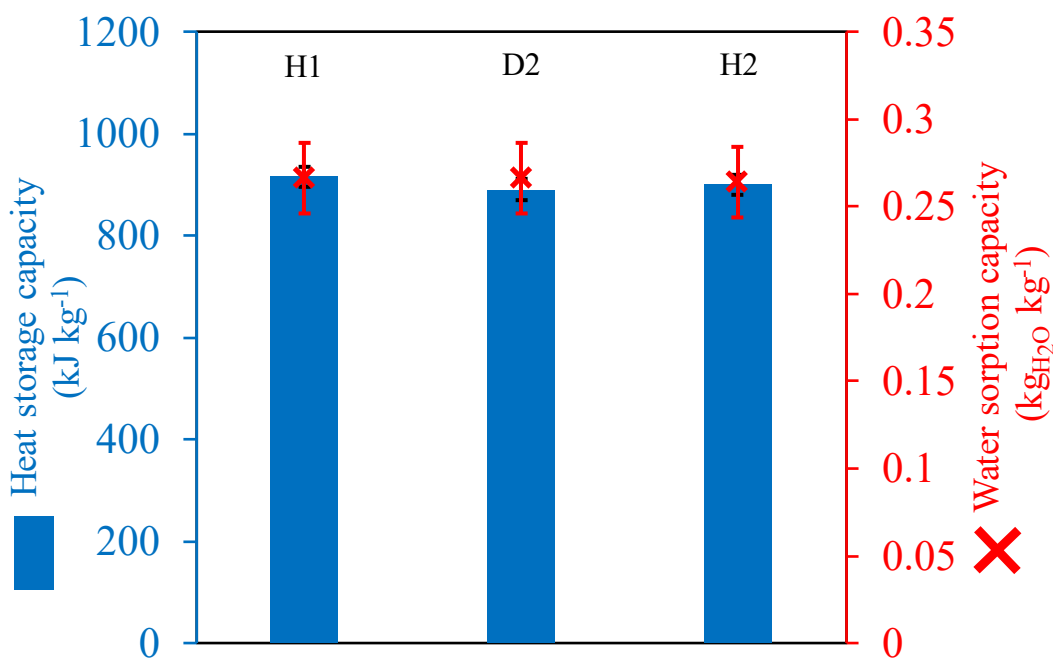

**Figure S15.** Heat and water storage capacities of LiX(b)@Mg during first hydration (H1), second dehydration (D2) and second hydration (H2).

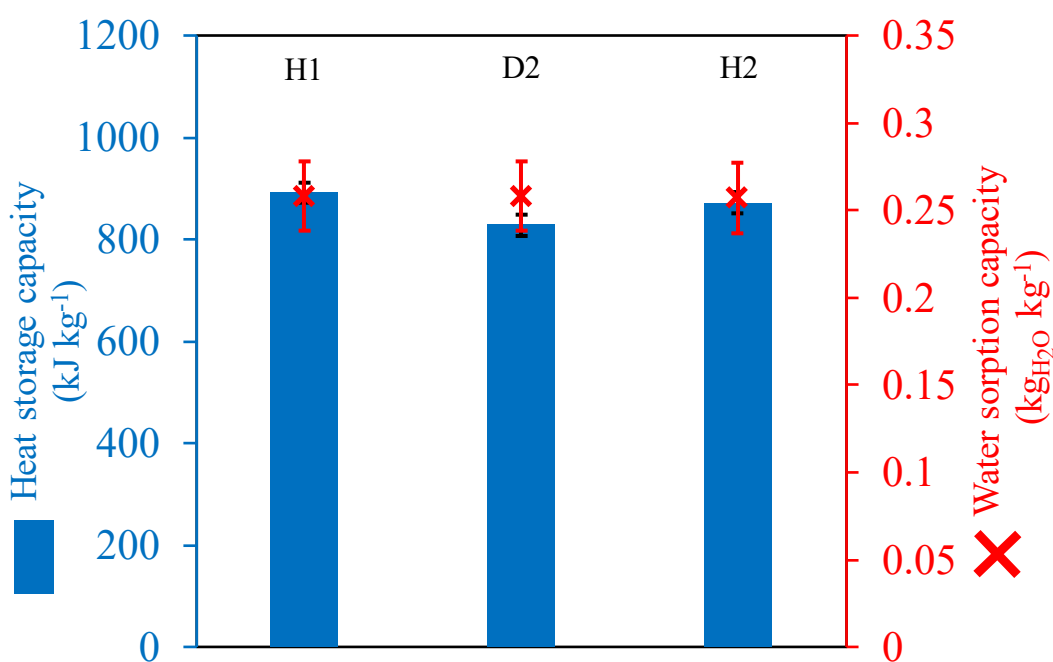

**Figure S16.** Heat and water storage capacities of LiX(b)@Li during first hydration (H1), second dehydration (D2) and second hydration (H2).

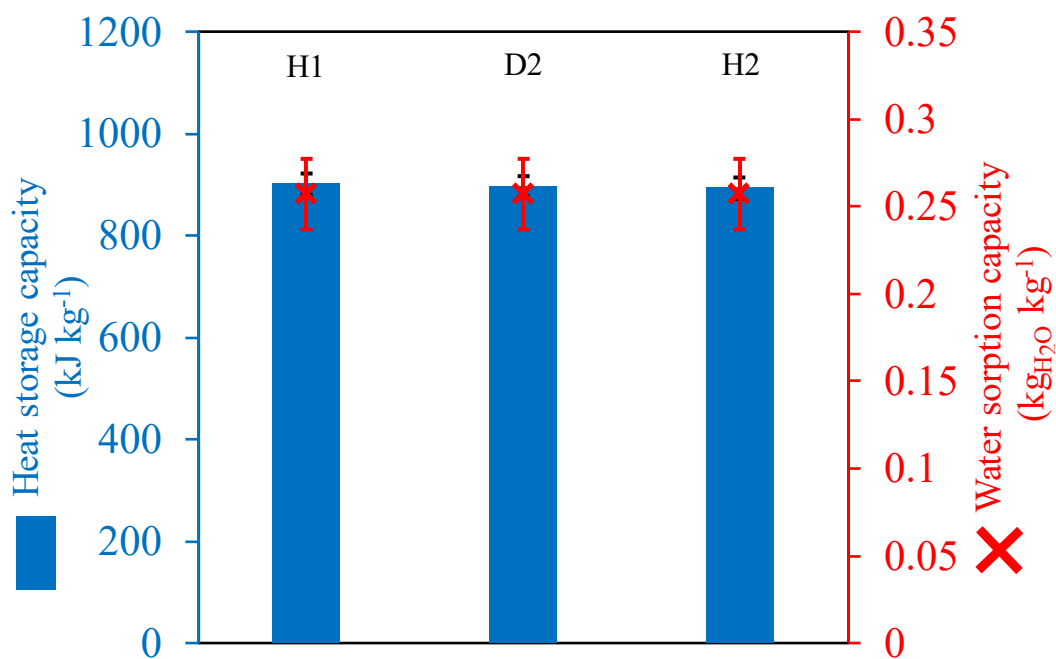

**Figure S17.** Heat and water storage capacities of LiX(b)@CaMg during first hydration (H1), second dehydration (D2) and second hydration (H2).

**Table S1.** Comparison of storage performances between studied composites-based zeolites and other composites in literature.

| Host matrix               | Salt content (wt.%) <sup>a</sup>                      | Hydration temperature (°C) | RH during hydration (%) | Dehydration temperature (°C) | Water sorption capacity (kg <sup>H<sub>2</sub>O</sup> kg <sup>-1</sup> ) <sup>b</sup> | Heat storage capacity (kJ kg <sup>-1</sup> ) <sup>c</sup> | Ref.      |
|---------------------------|-------------------------------------------------------|----------------------------|-------------------------|------------------------------|---------------------------------------------------------------------------------------|-----------------------------------------------------------|-----------|
| <b>Host matrices</b>      |                                                       |                            |                         |                              |                                                                                       |                                                           |           |
| 13X(b)                    | -                                                     | 25                         | 30                      | 300                          | 0.28                                                                                  | 1007                                                      | This work |
| 13X(p)                    | -                                                     | 25                         | 30                      | 300                          | 0.28                                                                                  | 1080                                                      | This work |
| LiX(b)                    | -                                                     | 25                         | 30                      | 300                          | 0.28                                                                                  | 1058                                                      | This work |
| 13X                       | -                                                     | 20                         | 55                      | 150                          | -                                                                                     | 928                                                       | [1]       |
| NaY                       | -                                                     | 20                         | 55                      | 150                          | -                                                                                     | 978                                                       | [1]       |
| SBA-15                    | -                                                     | 20                         | 30                      | 150                          | 0.04                                                                                  | -                                                         | [2]       |
| MCM-41                    | -                                                     | 20                         | 30                      | 150                          | 0.04                                                                                  | -                                                         | [2]       |
| AlPO-5                    | -                                                     | r.t.                       | 30                      | 400                          | 0.237                                                                                 | 703                                                       | [3]       |
| AlPO-18                   | -                                                     | r.t.                       | 30                      | 400                          | 0.283                                                                                 | 1192                                                      | [3]       |
| <b>Composites</b>         |                                                       |                            |                         |                              |                                                                                       |                                                           |           |
| 13X(b)                    | 4.8 wt% CaCl <sub>2</sub>                             | 25                         | 30                      | 300                          | 0.29                                                                                  | <b>0.21</b>                                               | This work |
| 13X(b)                    | 4.8 wt% MgSO <sub>4</sub>                             | 25                         | 30                      | 300                          | 0.26                                                                                  | <b>0.17</b>                                               | This work |
| 13X(b)                    | 5.1 wt% of LiCl                                       | 25                         | 30                      | 300                          | 0.28                                                                                  | <b>0.19</b>                                               | This work |
| 13X(b)                    | 2.6 wt% CaCl <sub>2</sub> + 2.5 wt% MgSO <sub>4</sub> | 25                         | 30                      | 300                          | 0.28                                                                                  | <b>0.20</b>                                               | This work |
| 13X(p)                    | 4.6 wt% CaCl <sub>2</sub>                             | 25                         | 30                      | 300                          | 0.29                                                                                  | 972                                                       | This work |
| LiX(b)                    | 5.2 wt% CaCl <sub>2</sub>                             | 25                         | 30                      | 300                          | 0.28                                                                                  | 900                                                       | This work |
| LiX(b)                    | 5.4 wt% MgSO <sub>4</sub>                             | 25                         | 30                      | 300                          | 0.28                                                                                  | 890                                                       | This work |
| LiX(b)                    | 4.7 wt% of LiCl                                       | 25                         | 30                      | 300                          | 0.26                                                                                  | 892                                                       | This work |
| LiX(b)                    | 2.7 wt% CaCl <sub>2</sub> + 2.5 wt% MgSO <sub>4</sub> | 25                         | 30                      | 300                          | 0.26                                                                                  | 897                                                       | This work |
| SBA-15                    | 7 wt% Al <sub>2</sub> (SO <sub>4</sub> ) <sub>3</sub> | 20                         | 30                      | 150                          | 0.17                                                                                  | 612                                                       | [2]       |
| MCM-41                    | 7 wt% Al <sub>2</sub> (SO <sub>4</sub> ) <sub>3</sub> | 20                         | 30                      | 150                          | 0.09                                                                                  | 334                                                       | [2]       |
| 13X                       | 15 wt% MgSO <sub>4</sub>                              | 30                         | 60                      | 300                          | 0.205                                                                                 | 636                                                       | [4]       |
| 13X                       | 10.8 wt% MgSO <sub>4</sub>                            | 25                         | 80                      | 150                          | -                                                                                     | 632                                                       | [5]       |
| Silica gel                | 13.8 wt% CaCl <sub>2</sub>                            | 20                         | 30                      | 300                          | 0.23                                                                                  | 746                                                       | [6]       |
| Alumina                   | 14.4 wt% CaCl <sub>2</sub>                            | 20                         | 30                      | 300                          | 0.17                                                                                  | 576                                                       | [6]       |
| Mesoporous ordered silica | 4 wt% CaCl <sub>2</sub>                               | 40                         | 16.6                    | 120                          | 0.10                                                                                  | 292                                                       | [7]       |

|                           |                          |    |      |     |      |      |     |
|---------------------------|--------------------------|----|------|-----|------|------|-----|
| Mesoporous ordered silica | 4 wt% CaCl <sub>2</sub>  | 40 | 16.6 | 120 | 0.14 | 428  | [7] |
| MIL-100(Fe)               | 46 wt% CaCl <sub>2</sub> | 30 | 86   | 80  | 0.47 | 1206 | [8] |
| MIL-101(Cr)               | 62 wt% CaCl <sub>2</sub> | 30 | 86   | 80  | 0.58 | 1728 | [8] |
| SBA-15                    | 62 wt% CaCl <sub>2</sub> | 25 | 30   | 150 | -    | 1698 | [9] |

<sup>a</sup> Determined by ICP-OES ( $\pm 2\%$ ). <sup>b</sup> Water sorption capacity determined with Eq. (2) on dehydrated sample at 300 °C ( $\pm 0.02$ ). <sup>c</sup> Dehydration heat determined by 2<sup>nd</sup> dehydration heat flow integration ( $\pm 20$  kJ kg<sup>-1</sup>).

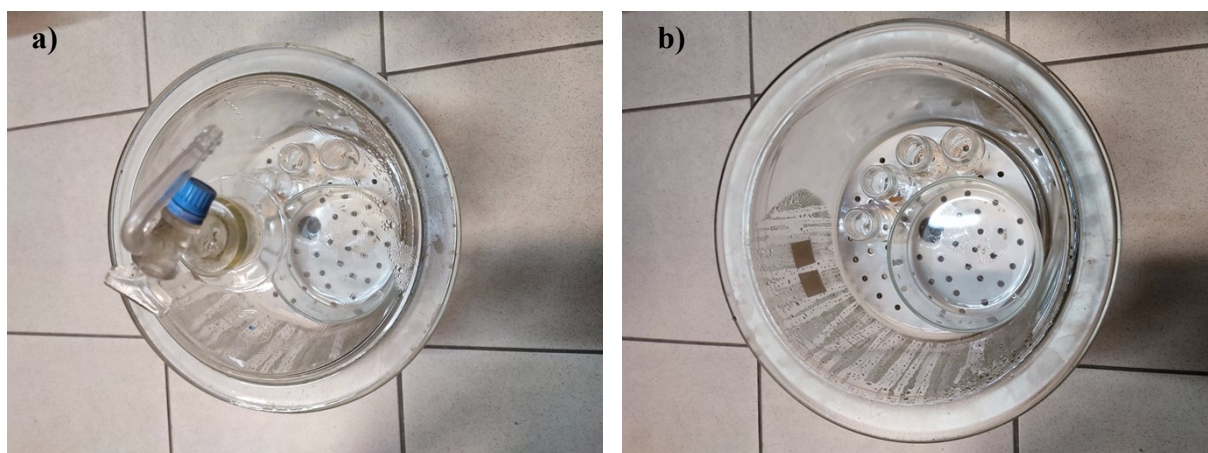

**Figure S18.** Photography of the water saturated environment with studied materials closed (a) and open (b).

**Table S2.** Textural characterization of materials after 800 h in closed environment (100 %RH)

| Name         | BET surface area (m <sup>2</sup> g <sup>-1</sup> ) | Total pore volume (cm <sup>3</sup> g <sup>-1</sup> ) <sup>a</sup> | Micropores volume (cm <sup>3</sup> g <sup>-1</sup> ) <sup>c</sup> |
|--------------|----------------------------------------------------|-------------------------------------------------------------------|-------------------------------------------------------------------|
| 13X(b)-ws    | 724                                                | 0.35                                                              | 0.27                                                              |
| 13X(b)@Ca-ws | 558                                                | 0.28                                                              | 0.20                                                              |
| LiX(b)-ws    | 742                                                | 0.41                                                              | 0.28                                                              |
| LiX(b)@Ca-ws | 559                                                | 0.35                                                              | 0.21                                                              |

<sup>a</sup> Determined for P/P<sub>0</sub> = 0.99. <sup>c</sup> Determined using the t-plot N<sub>2</sub>.

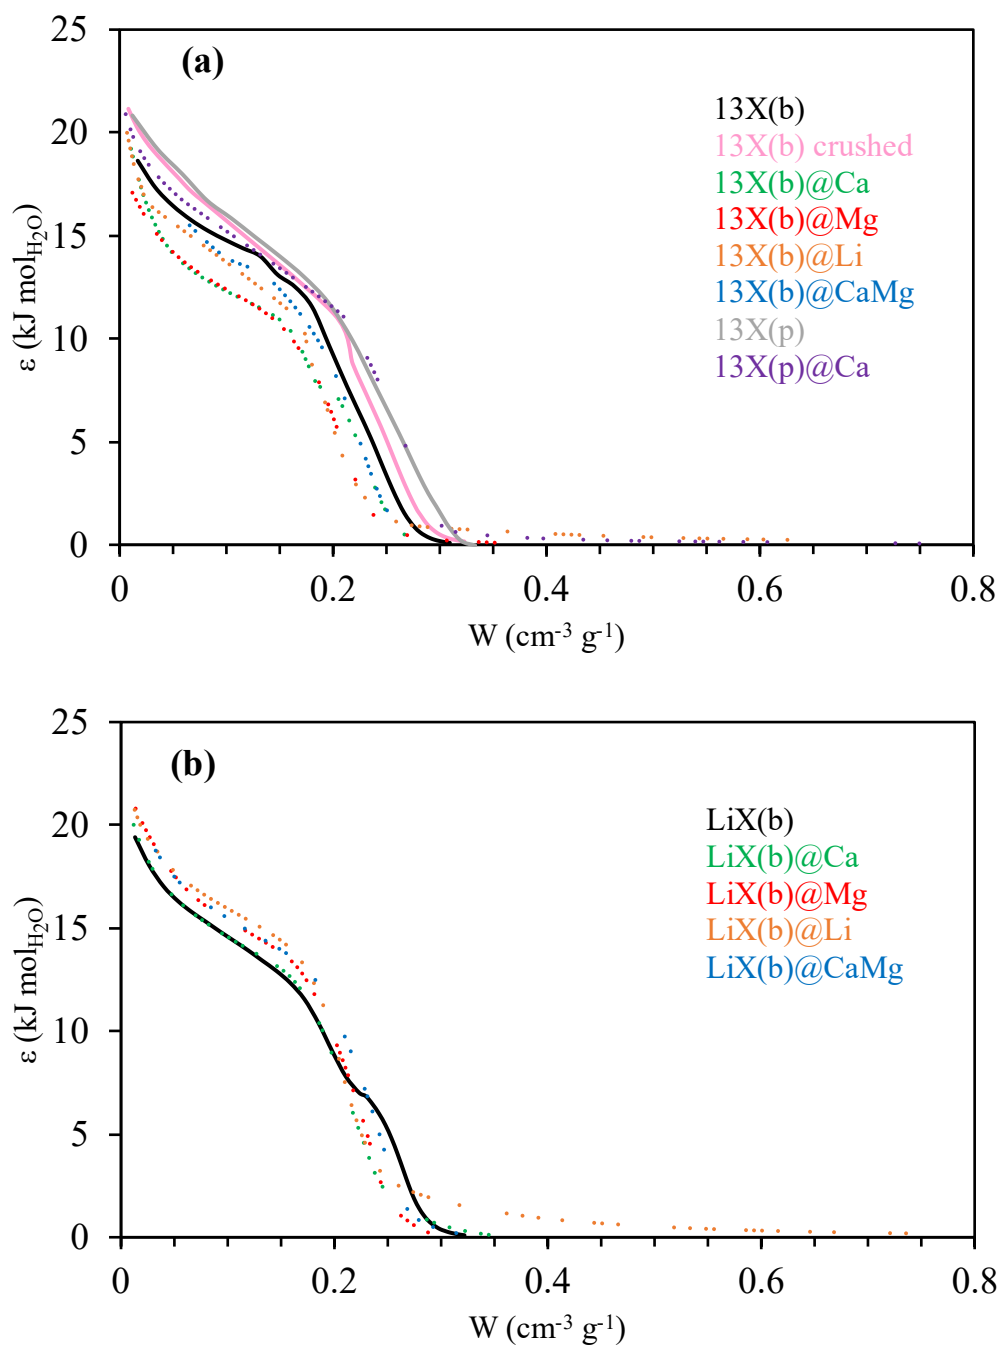

**Figure S19.** Evolution of the adsorption potential of water molecules in function of the water uptake of 13X (a), LiX(b) (b) and corresponding composites.

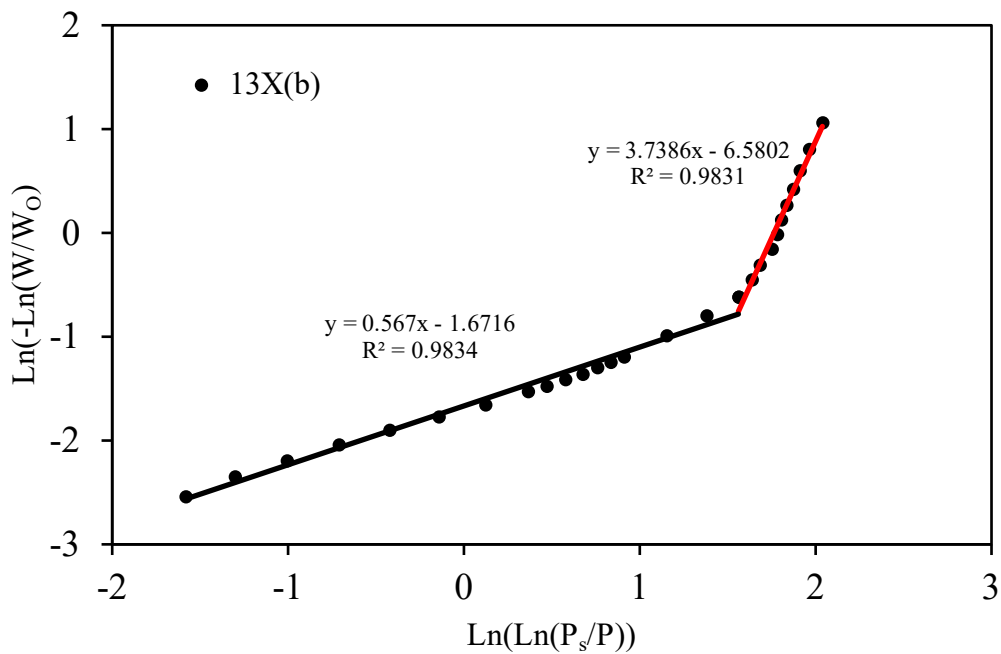

**Figure S20.** Linear transform of the Dubinin-Astakhov model of 13X(b).

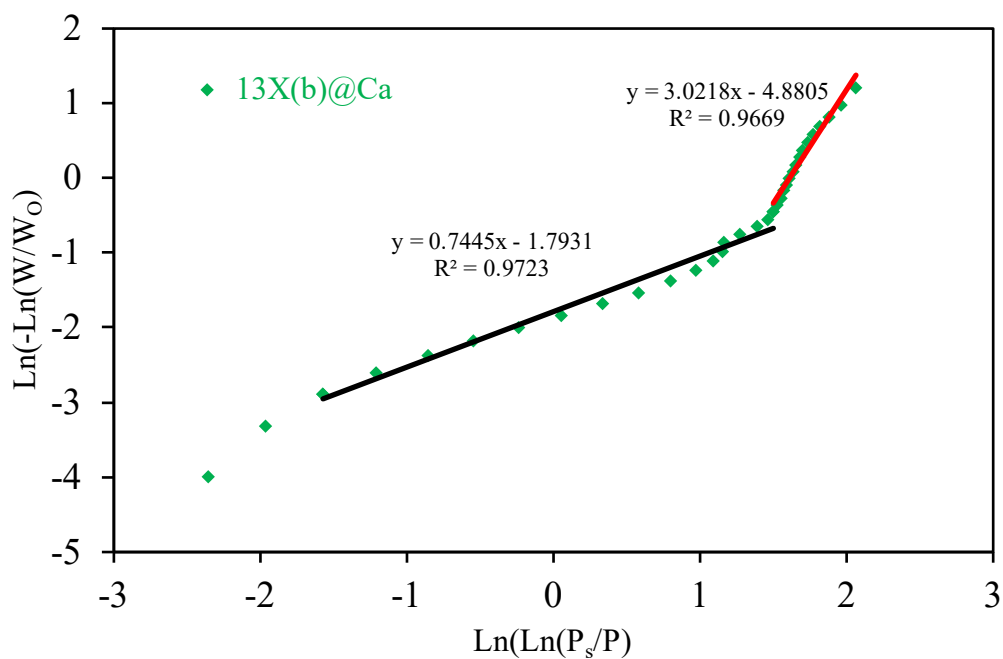

**Figure S21.** Linear transform of the Dubinin-Astakhov model of 13X(b)@Ca.

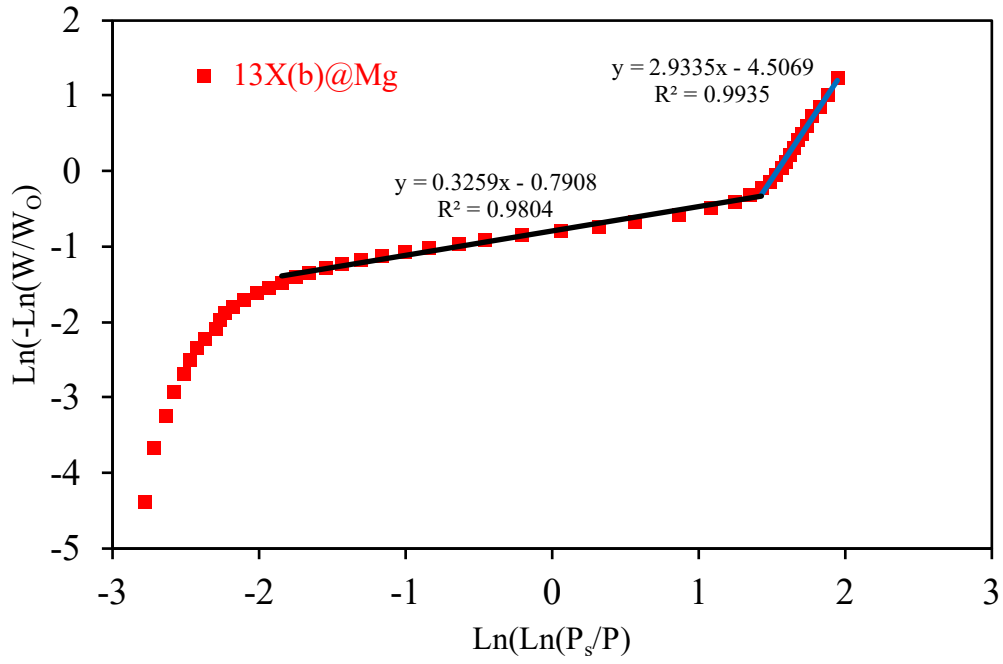

**Figure S22.** Linear transform of the Dubinin-Astakhov model of 13X(b)@Mg.

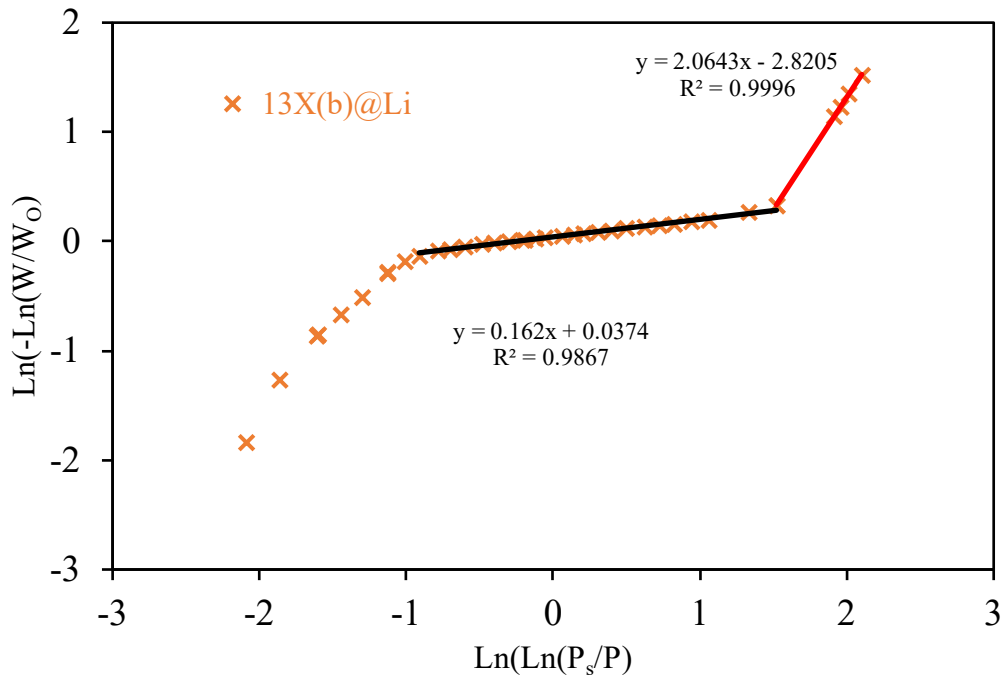

**Figure S23.** Linear transform of the Dubinin-Astakhov model of 13X(b)@Li.



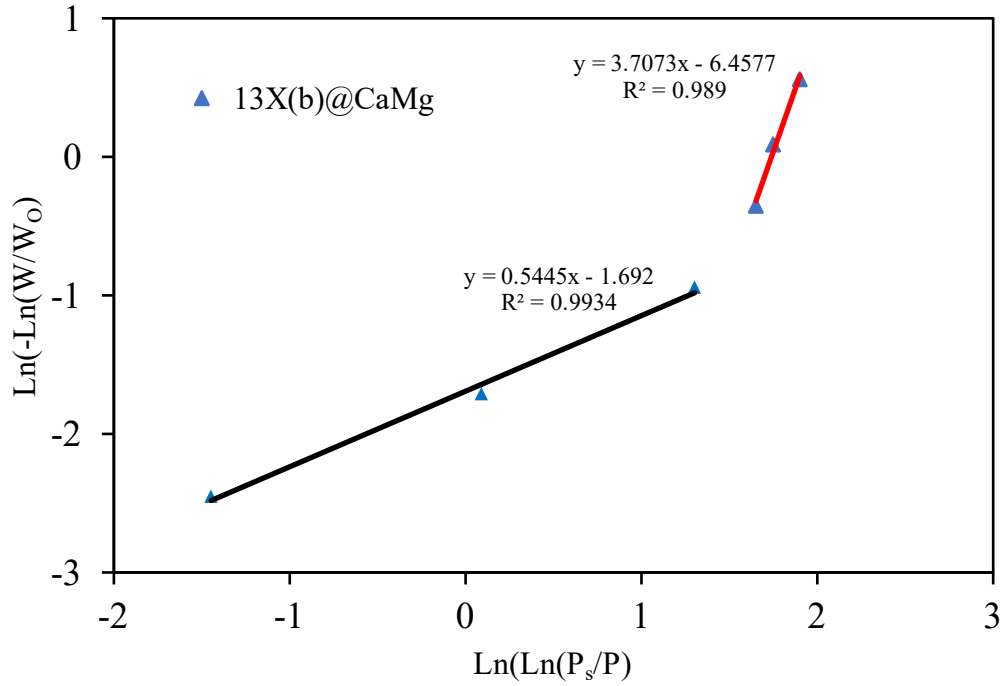

**Figure S24.** Linear transform of the Dubinin-Astakhov model of 13X(b)@CaMg.

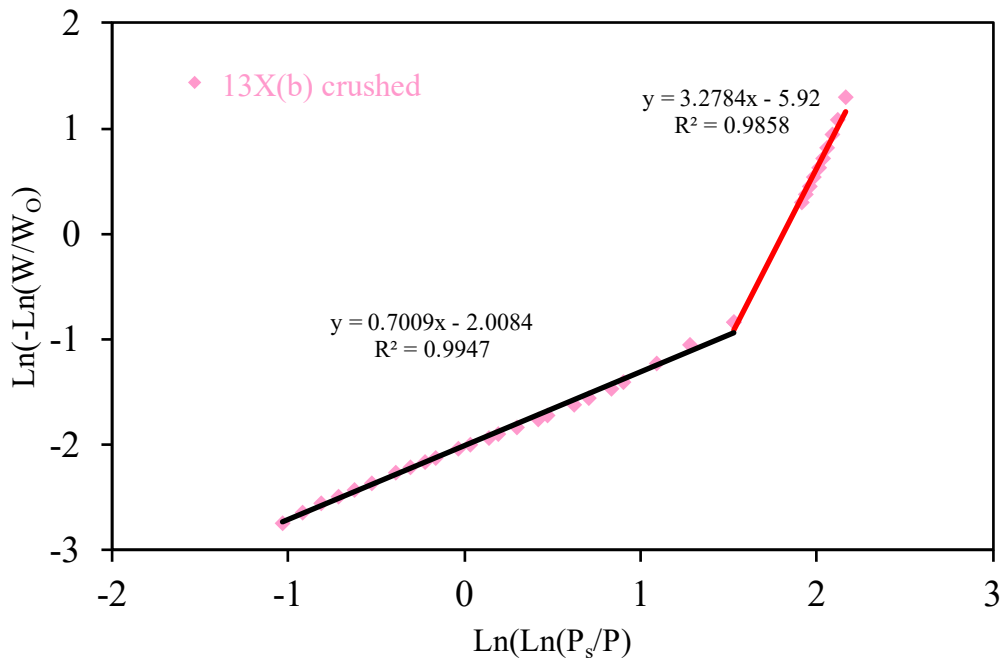

**Figure S25.** Linear transform of the Dubinin-Astakhov model of 13X(b) crushed.

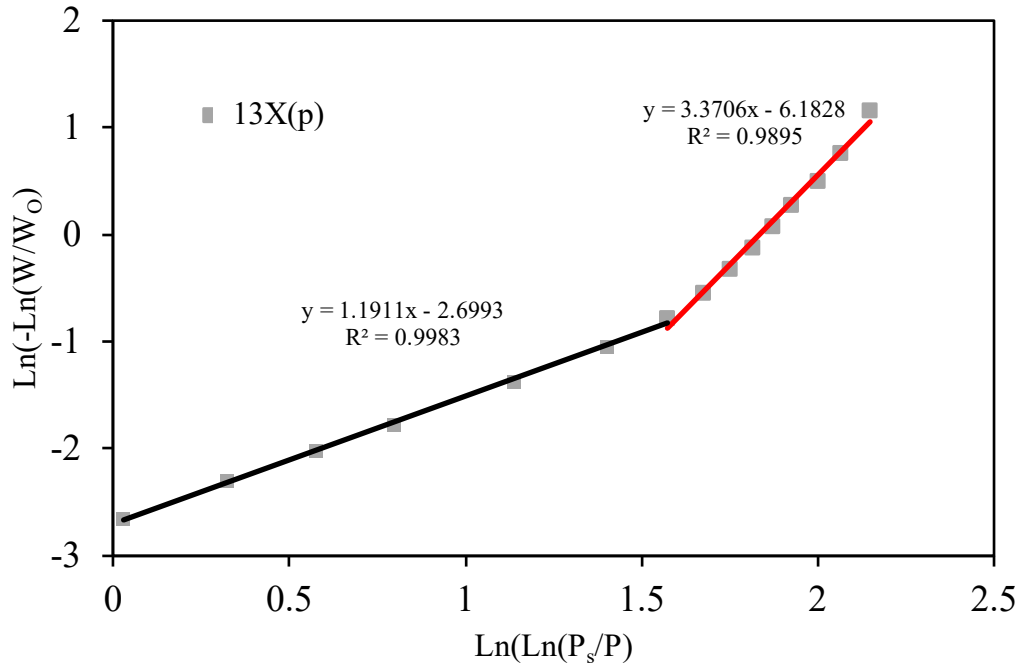

Figure S26. Linear transform of the Dubinin-Astakhov model of 13X(p).

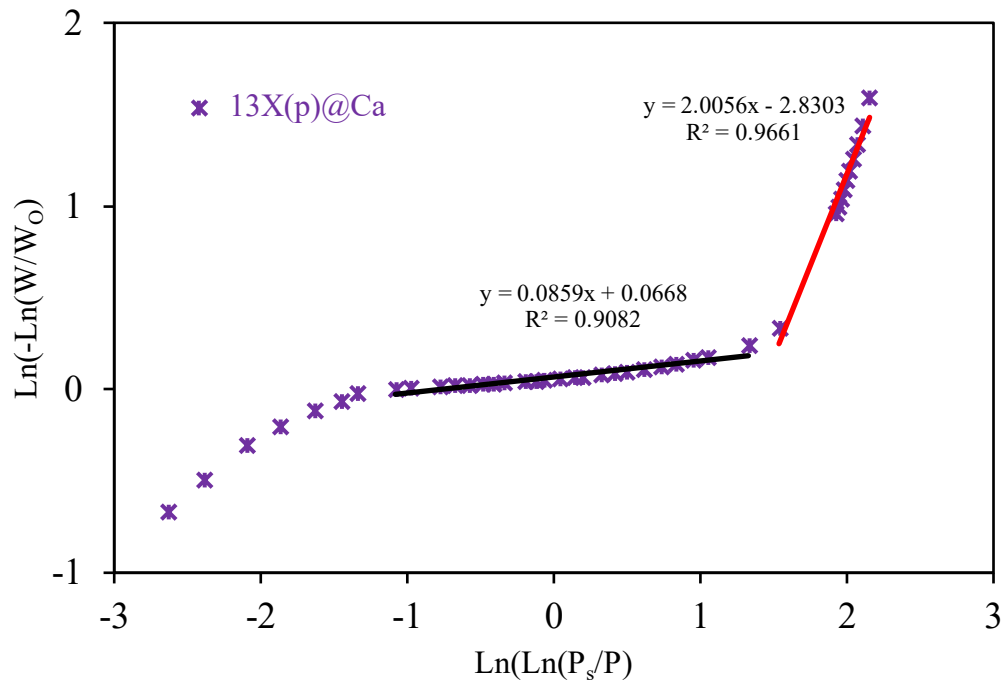

Figure S27. Linear transform of the Dubinin-Astakhov model of 13X(p)@Ca.

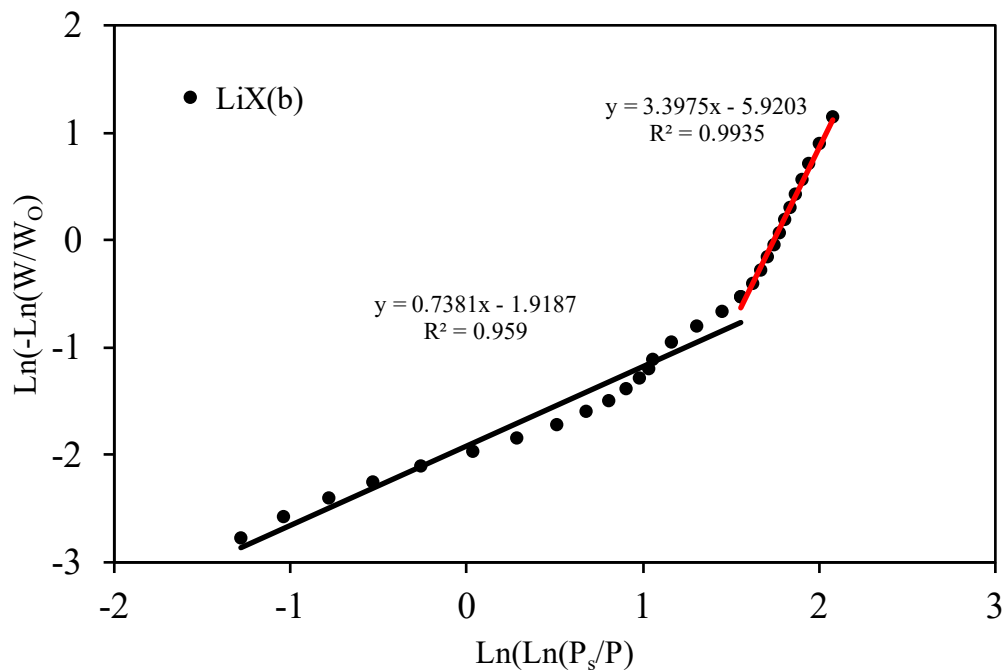

**Figure S28.** Linear transform of the Dubinin-Astakhov model of LiX(b).

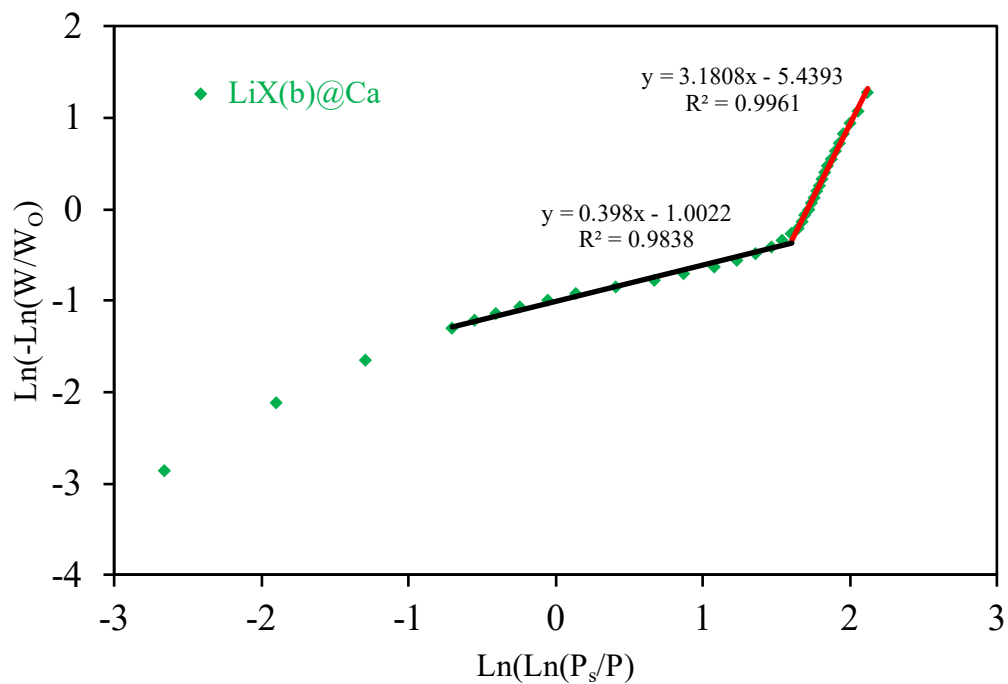

**Figure S29.** Linear transform of the Dubinin-Astakhov model of LiX(b)@Ca.

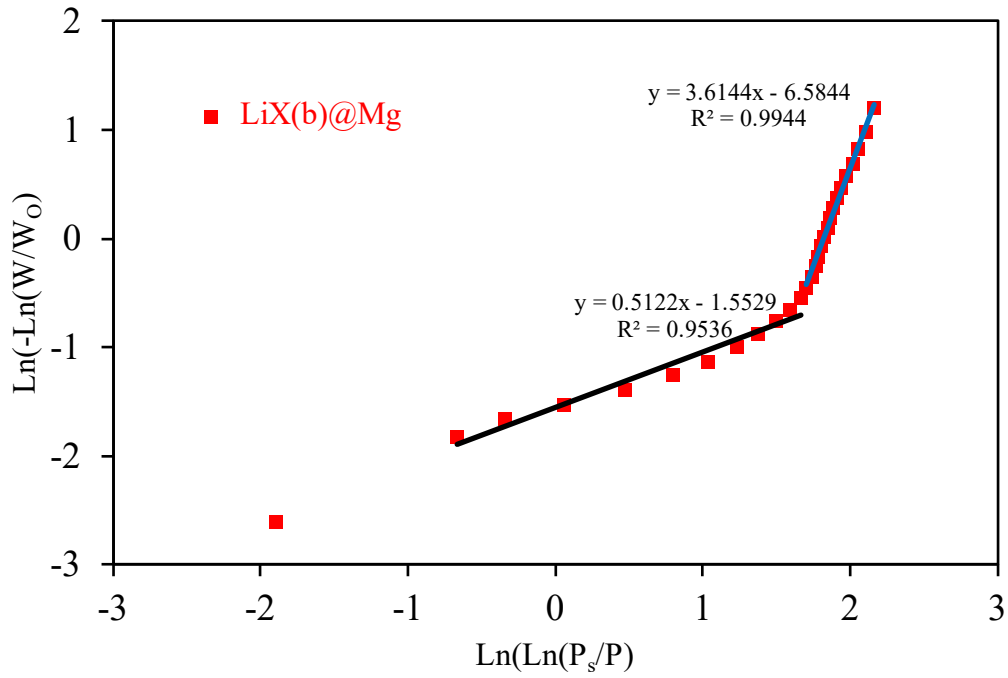

**Figure S30.** Linear transform of the Dubinin-Astakhov model of LiX(b)@Mg.

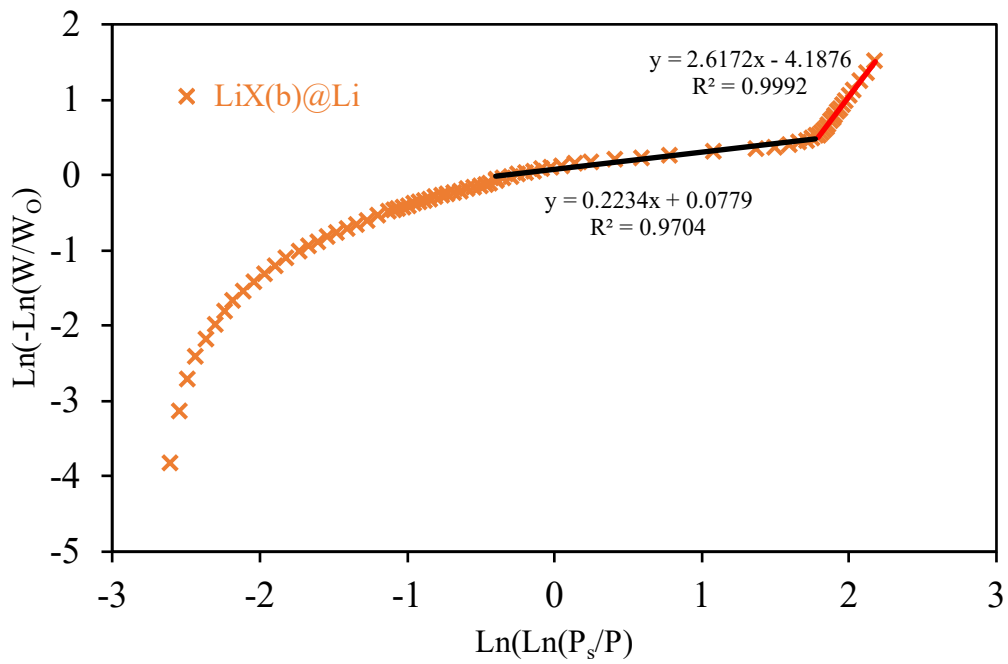

**Figure S31.** Linear transform of the Dubinin-Astakhov model of LiX(b)@Li.

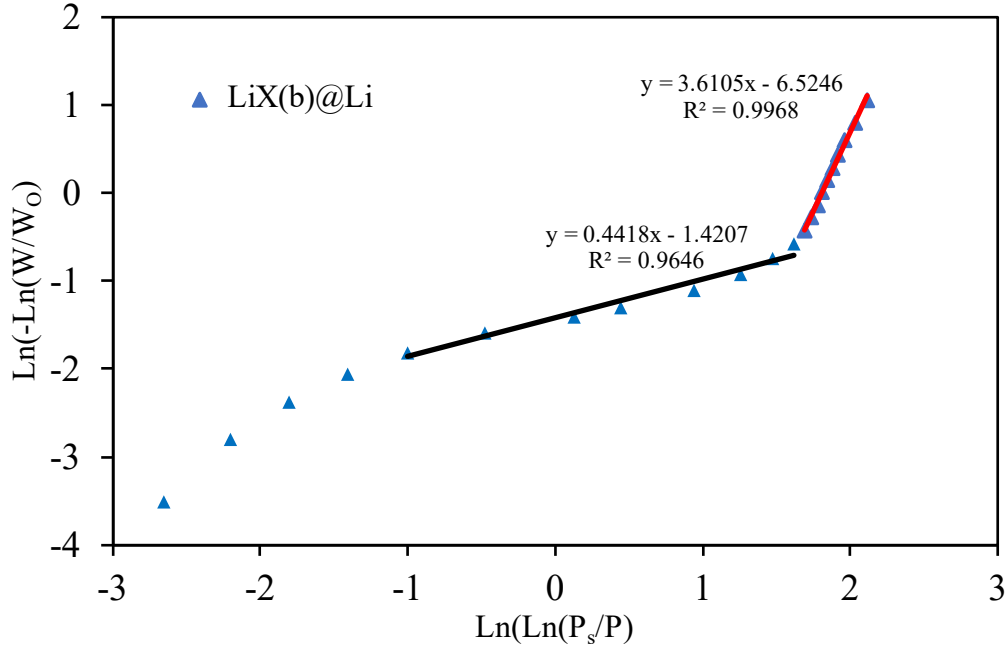

**Figure S32.** Linear transform of the Dubinin-Astakhov model of LiX(b)@CaMg.

**Dubinin and AsktaKhov model equations:**

This model is described by Eq. (S1):

$$W' = W_0 \exp\left(\frac{-\varepsilon}{E}\right)^n \text{ where } E = \frac{\beta}{\sqrt{K}} \wedge \varepsilon = RT \ln\left(\frac{P_s}{P}\right) \quad (\text{S1})$$

This equation can be transformed to a linear one by taking logarithms:

$$\ln(W') = \ln(W_0) - \left(\frac{RT}{E} \ln\left(\frac{P_s}{P}\right)\right)^n$$

$$\ln\left(-\ln\left(\frac{W'}{W_0}\right)\right) = n \ln\left(\frac{RT}{E}\right) + n \ln\left(\ln\left(\frac{P_s}{P}\right)\right)$$

In these equations,  $K$  represents the pore distribution constant,  $\beta$  the affinity coefficient of the sorptive,  $P_s$  the saturation pressure,  $P$  the partial pressure of water vapor,  $W'$  the amount of water sorbed, and  $W_e$  the maximal sorbed amount. The order of distribution  $n$  reflects the heterogeneity of the solid:  $n$  increases with the degree of homogeneity of the solid structure

**Table S3.** Parameters of the Dubinin-Astakhov adsorption model.

| sample         | $\theta^a$      | $n^b$ | $R^2$  |
|----------------|-----------------|-------|--------|
| 13X(b)         | $\theta < 0.64$ | 3.75  | 0.9831 |
|                | $\theta > 0.64$ | 0.57  | 0.9834 |
| 13X(b)@Ca      | $\theta < 0.63$ | 3.02  | 0.9669 |
|                | $\theta > 0.63$ | 0.74  | 0.9723 |
| 13X(b)@Mg      | $\theta < 0.49$ | 2.93  | 0.9935 |
|                | $\theta > 0.49$ | 0.33  | 0.9804 |
| 13X(b)@Li      | $\theta < 0.27$ | 2.06  | 0.9996 |
|                | $\theta > 0.27$ | 0.16  | 0.9867 |
| 13X(b)@CaMg    | $\theta < 0.66$ | 3.71  | 0.9890 |
|                | $\theta > 0.66$ | 0.54  | 0.9934 |
| 13X(b) crushed | $\theta < 0.68$ | 3.28  | 0.9858 |
|                | $\theta > 0.68$ | 0.70  | 0.9947 |
| 13X(p)         | $\theta < 0.64$ | 3.37  | 0.9895 |
|                | $\theta > 0.64$ | 1.19  | 0.9983 |
| 13X(p)@Ca      | $\theta < 0.30$ | 2.00  | 0.9661 |
|                | $\theta > 0.30$ | 0.08  | 0.9082 |
| LiX(b)         | $\theta < 0.64$ | 3.40  | 0.9935 |
|                | $\theta > 0.64$ | 0.74  | 0.9590 |
| LiX(b)@Ca      | $\theta < 0.50$ | 3.18  | 0.9961 |
|                | $\theta > 0.50$ | 0.40  | 0.9838 |
| LiX(b)@Mg      | $\theta < 0.62$ | 3.61  | 0.9944 |
|                | $\theta > 0.62$ | 0.51  | 0.9536 |
| LiX(b)@Li      | $\theta < 0.18$ | 2.62  | 0.9992 |
|                | $\theta > 0.18$ | 0.22  | 0.9704 |
| LiX(b)@CaMg    | $\theta < 0.61$ | 3.61  | 0.9968 |
|                | $\theta > 0.61$ | 0.44  | 0.9646 |

<sup>a</sup> Filling factor determined at the intersection of the two regression lines.

<sup>b</sup> The parameter  $n$  corresponds to the slope of the regression lines.

## References

- [1] G. Whiting, D. Grondin, S. Benici, A. Auroux, Heats of water sorption studies on zeolite-  $MgSO_4$  composites as potential thermochemical heat storage materials, *Sol. Energy Mater. Sol. Cells* 12 112-119 (2013). <https://doi.org/10.1016/j.solmat.2013.01.020>.
- [2] A. Jabbari-Hichri, S. Bennici, A. Auroux, Effect of aluminium sulfate addition on the thermal storage performance of mesoporous SBA-15 and MCM-41 materials, *Sol. Energy Mater. Sol. Cells* 149 231-241 (2016). <http://doi.org/10.1016/j.solmat.2016.01.033>.
- [3] J. Jänchen, D. Ackermann, E. Weiler, H. Stach, W. Brösicke, Calorimetric investigation on zeolites,  $AlPO_4$ 's and  $CaCl_2$  impregnated attapulgite for thermochemical storage of heat, *Thermochim. Acta* 434 37-41. <https://doi.org/10.1016/j.tca.2005.01.009>.
- [4] S.X. Xu, Lemington, R.Z. Wang, L.M. Wang, J. Zhu, A zeolite 13X/magnesium sulfate-water sorption thermal energy storage device for domestic heating, *Energy Conver. Manag.* 171 98-109 (2018). <https://doi.org/10.1016/j.enconman.2018.05.077>.
- [5] Q. Wang, Y. Xie, B. Ding, G. Yu, F. Ye, C. Xu, structure and hydration state characterizations of  $MgSO_4$ -zeolite 13x composite materials for long-term thermochemical heat storage, *Sol. Energy Mater. Sol. Cells* 200 110047 (2019). <https://doi.org/10.1016/j.solmat.2019.110047>.
- [6] A. Jabbari-Hichri, S. Bennici, A. Auroux, Enhancing the heat storage density of silica-alumina by addition of hygroscopic salts ( $CaCl_2$ ,  $Ba(OH)_2$ , and  $LiNO_3$ ), *Sol. Energy Mater. Sol. Cells*. 140 351-360 (2015). <https://doi.org/10.1016/j.solmat.2015.04.032>.
- [7] A. Ristic, N. Zabukovec Logar, New composite water sorbents  $CaCl_2$ -PHTS for low-temperature sorption heat storage: determination of structural properties, 9 27 (2019). <https://doi.org/10.3390/nano9010027>.

- [8] A. Permyakova, S. Wang, E. Courbon, F. Nouar, N. Heymans, P. D'ans, N. Barrier, P. Billefont, G. De Weireld, N. Steunou, M. Frère, C. Serre, Design of salt-metal organic framework composites for seasonal heat storage applications. *J. Mater. Chem. A* 5 12889 (2017). <https://doi.org/10.1039/c7ta03069j>.
- [9] L. Silvester, Q. Touloumet, A. Kamaruddin, F. Chassagneux, G. Postole, A. Auroux, L. Bois, Influence of silica functionalization on water sorption and thermochemical heat storage of mesoporous SBA-15/CaCl<sub>2</sub> composites, *ACS Appl. Energy Mater.* 4 5944-5956 (2021). <https://doi.org/10.1021/acsaem.1c00786>.
